# Supplementary material for: Maternal or Infant Antiretroviral Drugs to Reduce HIV-1 Transmission
Source: Atypon-hosted journal article supplement (doi:10.1056/nejmoa0911486), 2010-06-16
Supplement: nejm_chasela_2271sa1.pdf [file nejm_chasela_2271sa1.pdf]

## Supplementary Appendix

This appendix has been provided by the authors to give readers additional information about their work.

Supplement to: Chasela CS, Hudgens MG, Jamieson DJ, et al. Maternal or infant antiretroviral drugs to reduce HIV-1 transmission. *N Engl J Med* 2010;362:2271-81.

## Supplementary Appendix

This appendix has been provided by the authors to give readers additional information about their work.

### **Maternal Antiretrovirals or Infant Nevirapine to Reduce HIV-1 Transmission**

#### **Methods Section:**

The Malawi Global Fund Program did not implement antenatal zidovudine in women with CD4 lymphocyte counts > 250 cells per cubic millimeter until after our study enrollment had ceased in January 2008 (and then at only one site). Women were counseled on the benefits and risks of breastfeeding, and each received a family maize supplement (2 kg/week). Both women and infants received recommended vaccines and treatment for intercurrent infections. Beginning December 1, 2005, trimethoprim-sulfamethoxazole was given as prophylaxis to all mothers after the first trimester with CD4 <500 cells per cubic millimeter (480 mg twice daily), and to all infants older than 6 weeks (240 mg once daily). Mothers who developed AIDS-defining conditions or CD4 <250 cells per cubic millimeter were immediately referred for treatment. Mother-infant pairs lost to follow-up prior to 28 weeks were traced by a team of community nurses to determine vital and HIV status. Enrollment began in April 2004, and the last 28-week visit was in September 2009.

Both labs (the University of North Carolina at Chapel Hill Retrovirology Laboratory and the UNC Project Laboratory in Lilongwe, Malawi) are certified as proficient in HIV DNA and RNA testing by the NIH Division of AIDS Virus Quality Assurance Lab.

In the mothers on antiretrovirals, stavudine was substituted for zidovudine for hematologic toxicity, and nevirapine was substituted for nelfinavir for severe rash or hepatitis. In infants receiving nevirapine prophylaxis who developed a rash and eosinophilia, lamivudine was substituted. To ensure that there were no late complications of the interventions, we

monitored toxicities for 8 weeks after the intervention was discontinued or 36 weeks postpartum.

The trial was monitored by the NIAID Vaccine and Prevention Data and Safety Monitoring Board (DSMB). When the DSMB recommended stopping enrollment in the control arm in March 2008, all participants in the control arm were offered the choice to receive maternal antiretrovirals, infant nevirapine, or to remain in the control arm.

Although the maternal antiretroviral regimen changed twice during the trial, this was a strategy trial examining two different types of antiretroviral prophylaxis, maternal and infant, as opposed to testing specific antiretroviral regimens. As the medications used in the maternal-regimen group changed over the course of the study from a nevirapine-based, to nelfinavir-based, to lopinavir/ritonavir-based regimen, we examined the effect on transmission and HIV-free survival by type of maternal antiretroviral regimen. As the third component of the antiretroviral regimen, 27 women received nevirapine alone, 141 women received nelfinavir alone, 662 women received lopinavir/ritonavir alone, and 19 women switched antiretroviral regimens during study participation. Additional analyses were conducted using a Cox proportional hazards model with maternal antiretroviral regimen as a time varying covariate allowing for women to switch regimens during the study. Among all infants in the maternal-regimen group, no difference was found in the risk of infant HIV-1 transmission for the different regimens ( $p=0.37$ ).

**Table 1: Medication substitution table for toxicities in mothers**

| <b>Toxicity</b>                                                                              | <b>Original Study Drug</b>                                     | <b>Substitution</b>                                                                                             |
|----------------------------------------------------------------------------------------------|----------------------------------------------------------------|-----------------------------------------------------------------------------------------------------------------|
| Grade 3 or 4 Anemia, neutropenia, thrombocytopenia                                           | Zidovudine (ZDV) as part of Combivir (ZDV/3TC) one twice daily | Stavudine (d4T) 40 mg if body weight $\geq$ 60 kg and 30 mg if < 60 kg plus lamivudine (3TC) 150 mg twice daily |
| Grade 2B, 3, 4 Rash and grade 2, 3, or 4 ALT or clinical hepatitis<br>Grade 2A rash with HSR | Nevirapine (NVP) 200 mg twice daily                            | Nelfinavir (NFV) 1250 mg twice daily                                                                            |

**Table 2: Medication substitution table for toxicities in infants**

| <b>Toxicity</b>                                                                             | <b>Infant on Nevirapine</b> |                     | <b>Mother on Nevirapine</b> |                     |
|---------------------------------------------------------------------------------------------|-----------------------------|---------------------|-----------------------------|---------------------|
|                                                                                             | <b>Original Drug</b>        | <b>Substitution</b> | <b>Original Drug</b>        | <b>Substitution</b> |
| Grade 3 or 4 Anemia, neutropenia, thrombocytopenia                                          | NVP                         | 3TC                 | ZDV/3TC/NVP                 | d4T/3TC/NVP         |
| Grade 2B, 3, 4 Rash<br>Grade 2A rash with HSR<br>Clinical Hepatitis or Grade 2, 3, or 4 ALT | NVP                         | 3TC                 | ZDV/3TC/NVP                 | ZDV/3TC/Nelfinavir  |

**Table 3. Percentage reported type of breast feeding by visit**

|                  | <b>Infant Nevirapine</b> |            |            | <b>Maternal Regimen</b> |            |            | <b>Control</b> |            |            | <b>P-value*</b> |
|------------------|--------------------------|------------|------------|-------------------------|------------|------------|----------------|------------|------------|-----------------|
|                  | <b>EBF<sup>†</sup></b>   | <b>MBF</b> | <b>NBF</b> | <b>EBF</b>              | <b>MBF</b> | <b>NBF</b> | <b>EBF</b>     | <b>MBF</b> | <b>NBF</b> |                 |
| <b>12-18 wks</b> | 98.3                     | 1.2        | 0.5        | 97.6                    | 1.9        | 0.5        | 98.1           | 1.3        | 0.6        | 0.83            |
| <b>18-21 wks</b> | 97.3                     | 2.1        | 0.6        | 96.1                    | 2.1        | 1.8        | 95.8           | 3.3        | 0.9        | 0.20            |
| <b>21-24 wks</b> | 90.4                     | 5.0        | 4.6        | 88.9                    | 6.0        | 5.1        | 87.8           | 7.6        | 4.6        | 0.51            |
| <b>24-28 wks</b> | 9.0                      | 23.6       | 67.4       | 7.3                     | 24.8       | 67.8       | 5.5            | 27.2       | 67.3       | 0.23            |

\* A Fisher's exact test p-value is given at each visit, indicating whether there is a difference in the probability of reporting no breastfeeding between each of the two different antiretroviral arms and the control arm.

<sup>†</sup> EBF=Exclusive breastfeeding, MBF=Mixed breastfeeding, NBF=No breastfeeding

**Table 4. Serious adverse events (SAEs) other than deaths in mothers by intervention.**

| SAE                         | Treatment                |                           |                           |                           |                 |                           | Total          |                           | P-value              |                    |
|-----------------------------|--------------------------|---------------------------|---------------------------|---------------------------|-----------------|---------------------------|----------------|---------------------------|----------------------|--------------------|
|                             | Maternal Regimen [n=849] |                           | Infant Nevirapine [n=852] |                           | Control [n=668] |                           | Total [n=2369] |                           | Maternal vs. Control | Infant vs. Control |
|                             | N*                       | % of mothers with ≥ 1 SAE | N*                        | % of mothers with ≥ 1 SAE | N*              | % of mothers with ≥ 1 SAE | N*             | % of mothers with ≥ 1 SAE |                      |                    |
| Puerperal Sepsis            | 11                       | 1.30                      | 3                         | 0.35                      | 4               | 0.60                      | 18             | 0.76                      | 0.201                | 0.706              |
| Pneumonia                   | 6                        | 0.71                      | 3                         | 0.35                      | 4               | 0.60                      | 13             | 0.55                      | 1.000                | 0.706              |
| Serious febrile illness     | 7                        | 0.71                      | 4                         | 0.47                      | 3               | 0.45                      | 14             | 0.55                      | 1.000                | 1.000              |
| Tuberculosis                | 3                        | 0.35                      | 2                         | 0.23                      | 3               | 0.45                      | 8              | 0.34                      | 1.000                | 0.659              |
| Diarrhea                    | 4                        | 0.35                      | 0                         | 0                         | 0               | 0                         | 4              | 0.13                      | 0.507                | -                  |
| Hepatitis, clinical         | 2                        | 0.24                      | 0                         | 0                         | 0               | 0                         | 2              | 0.08                      | 0.507                | -                  |
| Rash***                     | 1                        | 0.12                      | 0                         | 0                         | 1               | 0.15                      | 2              | 0.08                      | 1.000                | 0.440              |
| Malaria                     | 2                        | 0.24                      | 4                         | 0.47                      | 0               | 0                         | 6              | 0.25                      | 0.507                | 0.136              |
| NVP hypersensitivity        | 6                        | 0.71                      | 0                         | 0                         | 0               | 0                         | 6              | 0.25                      | <b>0.038</b>         | -                  |
| Vomiting                    | 2                        | 0.24                      | 0                         | 0                         | 0               | 0                         | 2              | 0.08                      | 0.507                | -                  |
| Pelvic inflammatory disease | 0                        | 0                         | 0                         | 0                         | 1               | 0.15                      | 1              | 0.04                      | 0.440                | 0.440              |
| Syphilis                    | 1                        | 0.12                      | 0                         | 0                         | 0               | 0                         | 1              | 0.04                      | 1.000                | -                  |
| Other**                     | 0                        | 0                         | 1                         | 0.12                      | 2               | 0.30                      | 3              | 0.13                      | -                    | 1.000              |
| <b>Total</b>                | 45                       | 4.59                      | 17                        | 1.64                      | 18              | 2.69                      | 80             | 3.00                      | 0.052                | 0.406              |

\* Count may include more than one SAE per mother.

\*\* Bleeding arterio-venous fistula, cellulitis/abscess, jaundice.

\*\*\* Non-nevirapine related.

**Table 5. Serious adverse events (SAEs) in infants other than deaths by intervention**

| SAE                     | Treatment                |                           |                           |                           |                 |                           | Total          |                           | P-value              |                    |
|-------------------------|--------------------------|---------------------------|---------------------------|---------------------------|-----------------|---------------------------|----------------|---------------------------|----------------------|--------------------|
|                         | Maternal Regimen [n=849] |                           | Infant Nevirapine [n=852] |                           | Control [n=668] |                           | Total [n=2369] |                           | Maternal vs. Control | Infant vs. Control |
|                         | N*                       | % of infants with ≥ 1 SAE | N*                        | % of infants with ≥ 1 SAE | N*              | % of infants with ≥ 1 SAE | N*             | % of infants with ≥ 1 SAE |                      |                    |
| Serious febrile illness | 61                       | 7.18                      | 63                        | 7.28                      | 36              | 5.39                      | 160            | 6.71                      | 0.170                | 0.185              |
| Pneumonia               | 36                       | 4.12                      | 36                        | 3.99                      | 32              | 4.79                      | 104            | 4.26                      | 0.605                | 0.366              |
| Diarrhea                | 11                       | 1.30                      | 8                         | 0.94                      | 7               | 1.05                      | 26             | 1.10                      | 0.812                | 1.000              |
| Malaria                 | 8                        | 0.94                      | 15                        | 1.41                      | 9               | 1.20                      | 32             | 1.18                      | 0.778                | 0.743              |
| Meningitis              | 7                        | 0.82                      | 11                        | 1.29                      | 6               | 0.90                      | 24             | 1.01                      | 1.000                | 0.625              |
| NVP hypersensitivity    | 1                        | 0.12                      | 16                        | 1.88                      | 0               | 0                         | 17             | 0.72                      | 1.000                | <b>&lt;0.001</b>   |
| Growth faltering        | 3                        | 0.35                      | 4                         | 0.23                      | 0               | 0                         | 7              | 0.21                      | 0.260                | 1.000              |
| Rash***                 | 2                        | 0.24                      | 3                         | 0.35                      | 1               | 0.15                      | 6              | 0.25                      | 1.000                | 0.635              |
| Vomiting                | 1                        | 0.12                      | 1                         | 0.12                      | 1               | 0.15                      | 3              | 0.13                      | 1.000                | 1.000              |
| Tuberculosis            | 0                        | 0                         | 0                         | 0                         | 1               | 0.15                      | 1              | 0.04                      | 0.440                | 0.440              |
| Other**                 | 1                        | 0.12                      | 2                         | 0.23                      | 2               | 0.30                      | 5              | 0.21                      | 1.000                | 1.000              |
| <b>Total</b>            | 131                      | 14.02                     | 159                       | 15.73                     | 95              | 12.57                     | 385            | 14.23                     | 0.588                | 0.145              |

\* Count may include more than one SAE per infant.

\*\* distended abdomen; spontaneous resolution, nasal congestion; hospitalized, croup, seizures

\*\*\* Non-nevirapine related

**Table 6. Infant Cause of Death Line Listing**

| <b>Treatment Arm</b> | <b>Age at Death (days)</b> | <b>HIV Status</b> | <b>Cause of death from death review</b>                                 |
|----------------------|----------------------------|-------------------|-------------------------------------------------------------------------|
| Maternal Regimen     | 2                          | Negative          | Neonatal sepsis                                                         |
| Maternal Regimen     | 11                         | Negative          | Pneumonia                                                               |
| Maternal Regimen     | 19                         | Negative          | Pneumonia                                                               |
| Maternal Regimen     | 22                         | Negative          | Unknown                                                                 |
| Maternal Regimen     | 48                         | Negative          | Pneumonia and staph aureus bacteremia                                   |
| Maternal Regimen     | 61                         | Negative          | Pneumonia                                                               |
| Maternal Regimen     | 61                         | Negative          | Diarrhea; failure to thrive                                             |
| Maternal Regimen     | 65                         | Negative          | Meningitis                                                              |
| Maternal Regimen     | 76                         | Negative          | Pneumonia                                                               |
| Maternal Regimen     | 92                         | Negative          | Unknown                                                                 |
| Maternal Regimen     | 173                        | Negative          | Sepsis                                                                  |
| Maternal Regimen     | 87                         | Positive          | Pneumonia                                                               |
| Infant Nevirapine    | 8                          | Negative          | Neonatal sepsis                                                         |
| Infant Nevirapine    | 13                         | Negative          | Neonatal sepsis                                                         |
| Infant Nevirapine    | 43                         | Negative          | Meningitis                                                              |
| Infant Nevirapine    | 57                         | Negative          | Meningitis                                                              |
| Infant Nevirapine    | 95                         | Negative          | Pneumonia                                                               |
| Infant Nevirapine    | 99                         | Negative          | Drowning                                                                |
| Infant Nevirapine    | 154                        | Negative          | Unknown                                                                 |
| Infant Nevirapine    | 176                        | Negative          | Sepsis                                                                  |
| Infant Nevirapine    | 187                        | Negative          | Sepsis                                                                  |
| Infant Nevirapine    | 16                         | Positive          | Pneumonia                                                               |
| Infant Nevirapine    | 110                        | Positive          | Severe malaria                                                          |
| Control              | 7                          | Negative          | Unknown                                                                 |
| Control              | 7                          | Negative          | Neonatal sepsis                                                         |
| Control              | 14                         | Negative          | Neonatal sepsis                                                         |
| Control              | 15                         | Negative          | Diabetes insipidus                                                      |
| Control              | 81                         | Negative          | Diarrhea                                                                |
| Control              | 105                        | Negative          | Pneumonia                                                               |
| Control              | 113                        | Negative          | Severe symptomatic anemia possibly due to trimethoprim-sulfamethoxazole |
| Control              | 168                        | Negative          | Unknown                                                                 |
| Control              | 192                        | Negative          | Seizures, probable organophosphate poisoning                            |

|         |     |          |                                              |
|---------|-----|----------|----------------------------------------------|
| Control | 12  | Positive | Neonatal sepsis                              |
| Control | 129 | Positive | Pneumonia, possibly<br>Pneumocystis jiroveci |
| Control | 131 | Positive | Pneumonia, possibly<br>Pneumocystis jiroveci |
| Control | 138 | Positive | Pneumonia                                    |
| Control | 169 | Positive | Unknown                                      |
